# Supplementary figures and images for: Solid-phase synthesis of titanium-oxo clusters and their unprecedented catalytic performance in oxidative desulfurization of fuel oil
Source: Royal Society of Chemistry journal article supplement (doi:10.1039/d4gc05728g), 2025-01-01

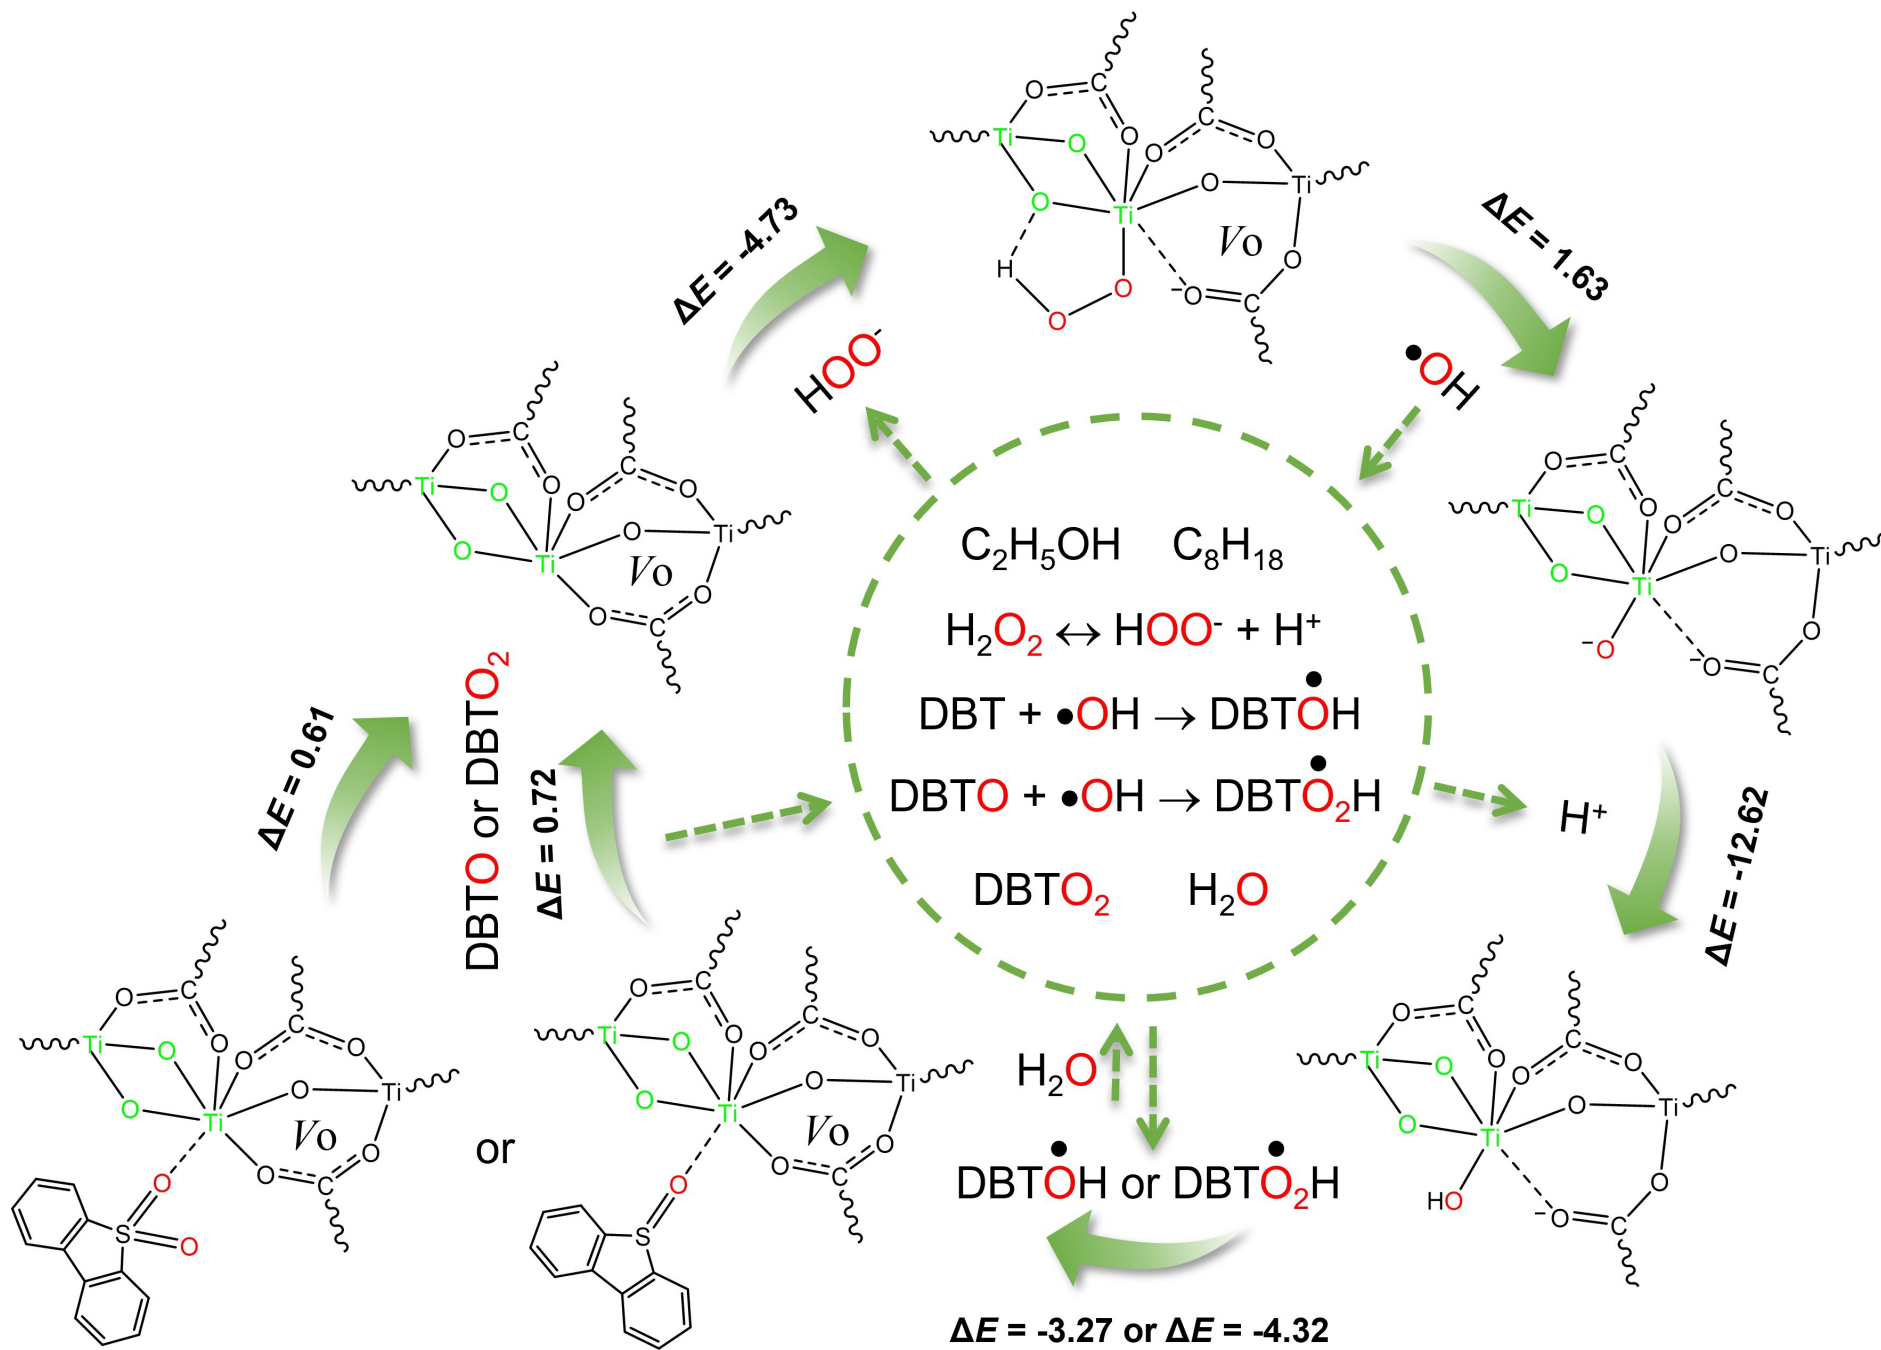

Supplement: d4gc05728g3.pdf [file d4gc05728g3.pdf]
